20 **Abstract**

21 **Objectives:** A screening tool for substance use disorders is most needed for  
22 patient care and referral. The study aims to develop the Substance Use Disorder  
23 Screening Test (SUDST) to classify the severity of substance use disorders  
24 based on the Fifth Edition of the Diagnostic and Statistical Manual of Mental  
25 Disorders (DSM-5).

26 **Methods:** Eleven items of the SUDST, developed based on the DSM-5, were  
27 tested on 207 participants who were receiving treatment for methamphetamine  
28 use. Participants were interviewed with the SUDST, the screening test of the  
29 Ministry of Public Health Version 2 (V.2), the Mini International Neuropsychiatric  
30 Inventory (M.I.N.I) and were clinically diagnosed by attending psychiatrists.

31 **Results:** Cronbach's alpha coefficient was 0.79. The SUDST was highly  
32 significantly associated with the M.I.N.I., V.2, and the clinical diagnosis ( $p <$   
33  $0.001$ ). Factor analysis showed three components: 1) preoccupation and loss of  
34 control 2) risky/harmful use and 3) impact to bio-psychosocial aspects. Of the  
35 total score of 11, the cut-off points to identify severe, moderate, and mild levels of  
36 risk were  $\geq 7$ , 5-6, and 3-4, respectively with sensitivity = 72.7%-96.5% and  
37 specificity = 61.9%-88.7%.

38 **Conclusions:** The SUDST had high reliability and validity that could be used for  
39 screening risk for substance use disorders.

40

41 **Key words:** Addiction, diagnosis, DSM, psychostimulants, scale development

42

43

44 **Introduction**

45

46 Substance use has caused problems in all continents around the world, affecting  
47 individuals, families, communities, and societies. In the South East Asian countries,  
48 the most common illicit substance use was cannabis, kratom, and  
49 methamphetamine (1-3), which the latter (commonly known as speed pill (yaba)  
50 and crystal meth (ice)) caused the most problem in the region. The Princess Mother  
51 National Institute for Drug Abuse Treatment (PMNIDAT), the first and largest  
52 treatment center for substance use disorders in Central Thailand and in the South  
53 East Asia with 600 in-patient bed capacities, reported statistics which showed  
54 nearly half of the patients having methamphetamine use disorder (4), which has  
55 been increasing each year from 40.26% in 2016, increasing to 46.39% in 2017,  
56 and to 54.35% in 2018. Most of the inpatients with methamphetamine use disorder  
57 in this treatment center had a history of psychiatric symptoms including anxiety or  
58 suspiciousness (91.2%), depression (86.8%), and hallucination (85.7%) (5).

59

60 An effective and user-friendly assessment tool for substance use disorders is most  
61 needed for patient care and referral to the allocated treatment settings for patient  
62 management. Treatment facilities for substance use disorder in Thailand has used  
63 The Ministry of Public Health's Screening Test Version 2 (V.2), which was adapted  
64 from the World Health Organization (WHO)'s Alcohol, Smoking, and Substance  
65 Involvement Screening Test (ASSIST) (6, 7). The V.2 has been used to assess  
66 levels of risk of substance use for allocating persons who used substance to each  
67 level of the formal treatment settings in Thailand. Persons who had low risk from  
68 the screening test were usually referred to the outpatient treatment at the general,

69 provincial, or district hospitals with service for persons who used substances while  
70 those with moderate risk were usually sent to the treatment program at the  
71 designated government locations in each province that was operated in  
72 collaboration between the Ministry of Public Health, Ministry of Defense, and  
73 Ministry of Justice, and Ministry of Interior (8). For people with high risk of  
74 methamphetamine use disorder as screened by the V.2 were usually sent to the  
75 inpatient treatment at the substance treatment facilities widely spread over four  
76 parts of Thailand.

77

78 In 2013, the American Psychiatric Association issued the Fifth Edition of the  
79 Diagnostic and Statistical Manual for Mental Disorder (DSM-5) (9) that view the  
80 substance use problems as a continuum of disorder from mild, moderate to severe  
81 substance use disorder. As such, the DSM-5 diagnosis for substance use  
82 disorders, especially methamphetamine, the most problematic illegal substance in  
83 the region, has never been tested or compared to the Thai V.2. In the study, we  
84 compared the DSM-5 criteria for substance use disorders with the current formal  
85 use of V.2, which is the main screening tool for allocating persons with illegal  
86 problems in Thailand to receive treatment by using the Substance Use Disorder  
87 Screening Test (SUDST), that had been newly developed based on the DSM-5  
88 criteria symptoms. The SUDST was then tested in the study for validity and  
89 reliability with clinical diagnosis by clinicians and the Mini International  
90 Neuropsychiatric Interview (M.I.N.I.). The study aims to investigate the reliability  
91 and validity of this new screening tool for clinical substance use disorder based on  
92 DSM-5 criteria. The new instrument may be used accordingly with other personal

93 and societal factors for allocating persons who use substance to get appropriate  
94 treatment for substance use based on their needs.

95

## 96 **Methods**

97

98 Two-hundreds and seven male and female patients aged 13 years and over  
99 receiving outpatient service for methamphetamine use from the PMNIDAT and  
100 its satellite hospitals in the four regions of Thailand including Central (PMNIDAT  
101 or Thanyarak Pathumthani), North (Thanyarak Chiang Mai), Northeast  
102 (Thanyarak Khon Kaen), and South (Thanyarak Songkla) were interviewed  
103 between August 2017 to December 2018 by attending psychiatrists for DSM-5  
104 substance use disorder diagnosis. All of them had at least 3 years experience in  
105 addiction treatment. The attending psychiatrists were blinded to the diagnosis  
106 made by the questionnaires used in the study. Risk and methamphetamine use  
107 disorder were obtained using the SUDST, the M.I.N.I. for methamphetamine use  
108 disorder and the V.2 by research nurses (with at least 5 years experience in  
109 addiction treatment). All interviewers attended a training class for M.I.N.I.,  
110 SUDST, and V.2. Individuals with cognitive impairment or psychosis (e.g.,  
111 history of being diagnosed with dementia, psychotic disorder) were excluded  
112 from the study. The study has been approved by the Ethics Committee of the  
113 PMNIDAT with study number: 59023.

114

115 The SUDST were developed from the DSM-5 criteria for substance use  
116 disorders (9). The test had 11 items for the respondent to answer yes or no to  
117 each question that correspond to what participants have experienced in the past

118 12 months of their substance use. The test was examined for content validity  
119 from 5 experts in the fields of addiction, behavioral science, and psychometric  
120 test. The Index of Item-Objective Congruence is 0.65. The screening tool was  
121 then adjusted per suggestion and tested in 30 subjects (10) with substance use.  
122 The language was then further adjusted based on suggestion from this initial field  
123 testing. The language-adjusted screening test was then tested for inter-rater  
124 reliability by two independent interviewers with the time interval not more than 1  
125 week apart. The content of the screening test includes four aspects of addiction  
126 including impaired control of substance use, social impairment from substance  
127 use, risky use of substance, and the pharmacological aspect of addiction.

128

129 The V.2 is the screening tool for referral persons with substance use problems in  
130 Thailand. It was developed by the Ministry of Public Health (MOPH) and was  
131 known as “Screening Form – MOPH: Version 2” or V.2 in brief. The test was  
132 adapted from the World Health Organization (WHO)’s Alcohol, Smoking, and  
133 Substance Involvement Screening Test (ASSIST), comprising of 6 questions  
134 related to behaviors of substance use, the impact of substance use, and the  
135 concern from others about one’s substance use in the past 3 months. Each item  
136 has 5 answer options from never, only 1-2 times total, about 1-3 times per month,  
137 about 1-4 days per week, and 5-7 days per week (almost every day) The total  
138 score was categorized to three levels (e.g., mild, moderate, and severe) risk for  
139 substance dependence.

140

141 The M.I.N.I., Methamphetamine Section, Thai version was adapted for the  
142 diagnosis of DSM-5 Substance Use Disorder in the study by R.K. and colleagues.

143 The original Thai M.I.N.I had two parts for substance diagnoses based on DSM-  
144 IV criteria to diagnose methamphetamine dependence (7 items) and  
145 methamphetamine abuse (4 items). In the current study, the item related to legal  
146 problem from substance use was excluded from algorithm of diagnosis and  
147 replaced by an item related to craving for substance in order to correspond to the  
148 DSM-5 criteria for substance use disorder. Having 2-3, 4-5, and 6 or more criteria  
149 mean having mild, moderate, or severe level of substance use disorders.

150

151 Data from all questionnaires were checked for completeness by a researcher.  
152 The total duration of data collection was 16 months. First we tested for reliability  
153 of the SUDST by using Cronbach's alpha coefficient for internal consistency.  
154 Concurrent validity of the questionnaire for DSM-5 diagnosis for substance use  
155 disorder was tested by using contingency coefficient with the clinical diagnosis. In  
156 addition, construct validity was tested by using Factor analysis. Finally, the  
157 SUDST was tested to determine the cut off point for the risk of having substance  
158 use disorder as provided by clinicians' judgment. Cut off points for differentiating  
159 levels of substance use disorders were analyzed by using area under the  
160 receiver operating characteristic (ROC) curve to have sensitivity and specificity  
161 values of the SUDST, the new screening tool for clinical substance use disorder  
162 based on DSM-5 criteria.

163

## 164 **Results**

165 Table 1 shows demographics of the participants in the study. Of 207 participants,  
166 most were male (88.4%), single (60.9%), and graduated from high school

167 (57.0%). The mean age was 29 years (SD = 8.3, Min = 14, Max = 53). Twenty-  
 168 seven percent of the participants were unemployed and 67.1% had drug related  
 169 offences in the past. Table 2 shows the substance use data. Most of the  
 170 participants used methamphetamine and other illegal substances including  
 171 cannabis and kratom (67.6%). About one-third (29.0%) used speed pills (yaba)  
 172 only without any other illegal substance. The average daily amount of speed pills  
 173 (yaba) consumed was 4 pills and the average duration of substance use was 7  
 174 years. Most individuals who used crystal meth (ice) did not know the daily amount  
 175 in grams.

176

177 **Table 1.** Demographic data of the participants in the study (N = 207).

|                             | n (N = 207)                          | %    |
|-----------------------------|--------------------------------------|------|
| Gender                      |                                      |      |
| Male                        | 183                                  | 88.4 |
| Female                      | 24                                   | 11.6 |
| Marital status              |                                      |      |
| Single                      | 126                                  | 60.9 |
| Married                     | 65                                   | 31.4 |
| Divorced, widow, separated  | 13                                   | 6.3  |
| Do not answer               | 3                                    | 1.4  |
| Age (years)                 | mean = 29 SD = 8.3 Min = 14 Max = 53 |      |
| ≤19                         | 27                                   | 13.0 |
| 20-29                       | 89                                   | 43.0 |
| 30-39                       | 66                                   | 31.9 |
| 40-49                       | 21                                   | 10.2 |
| ≥50                         | 4                                    | 1.9  |
| Level of education          |                                      |      |
| None                        | 1                                    | 0.5  |
| Primary school              | 45                                   | 21.8 |
| High school                 | 118                                  | 57.0 |
| Vocational school           | 28                                   | 13.5 |
| Bachelor or graduate degree | 15                                   | 7.2  |
| Occupation                  |                                      |      |
| Unemployed                  | 56                                   | 27.0 |
| Students                    | 11                                   | 5.3  |
| Employees                   | 73                                   | 35.5 |
| Farming / Fishery           | 16                                   | 7.6  |
| Business owners             | 39                                   | 18.8 |
| Government officers         | 10                                   | 4.8  |
| Do not answer               | 2                                    | 1.0  |
| Relationship in the family  |                                      |      |
| Good                        | 117                                  | 56.5 |
| No interaction / distant    | 21                                   | 10.1 |
| Fight some times            | 63                                   | 30.5 |
| Fight almost always         | 6                                    | 2.9  |
| Drug offence (s)            |                                      |      |
| Ever                        | 139                                  | 67.1 |
| Never                       | 68                                   | 32.9 |

178



179 **Table 2.** Substance and methamphetamine use data in the participants of the  
 180 study.

|                                   | n (N = 207)                        | %    |
|-----------------------------------|------------------------------------|------|
| Substance use                     |                                    |      |
| Speed pills (yaba) only           | 60                                 | 29.0 |
| Crystal meth (ice) only           | 3                                  | 1.5  |
| Speed pills and crystal meth only | 4                                  | 1.9  |
| Yaba/ice and other substances     | 140                                | 67.6 |
| Daily amount of yaba use (pills)  |                                    |      |
|                                   | mean =4 SD = 5.1 Min =0.5 Max 48   |      |
| ≤ 5                               | 143                                | 72.9 |
| 6-10                              | 20                                 | 10.1 |
| 11-15                             | 4                                  | 2.0  |
| 15 and above                      | 2                                  | 1.0  |
| Did not answer                    | 29                                 | 14.0 |
| Duration of yaba use (years)      |                                    |      |
|                                   | mean =84 SD = 74.4 Min =12 Max 576 |      |
| ≤ 5                               | 104                                | 52.5 |
| 6-10                              | 45                                 | 22.7 |
| 11-15                             | 25                                 | 12.6 |
| 16-20                             | 15                                 | 7.6  |
| 20 or more                        | 4                                  | 2.0  |
| Did not answer                    | 5                                  | 2.6  |
| Daily amount of ice use (grams)   |                                    |      |
| < 1 gram                          | 17                                 | 25.4 |
| 1 gram and more                   | 4                                  | 5.9  |
| Did not answer                    | 46                                 | 68.7 |
| Duration of ice use (years)       |                                    |      |
|                                   | mean =36 SD = 49.9 Min =2 Max 240  |      |
| ≤ 1                               | 10                                 | 14.9 |
| 2-5                               | 10                                 | 14.9 |
| 6 or more                         | 2                                  | 2.9  |
| Did not answer                    | 45                                 | 67.3 |

181

182 Regarding reliability of the SUDST, Cronbach's alpha coefficient is 0.79 which  
 183 reflects good internal consistency of the instrument but Cohen's kappa is only  
 184 0.45 for inter-rater reliability. Construct validity was tested by using Factor  
 185 analysis of the 11 questions used in the questionnaire and shown in Table 3.  
 186 Extraction method was used with the Principal component analysis by the  
 187 Varimax rotation. Three factors were found including preoccupation / loss of  
 188 control of use comprising of 4 questions, Risky or harmful use comprising of 3  
 189 questions, and the impact of use comprising of 4 questions. The correlation  
 190 between each construct is in high level (more than 0.4). The factor loading could  
 191 describe the variance at 51.8%. Specifically, Factor 1 could describe the variance  
 192 at 32.3%, Factor 2 could describe at 10.1%, and Factor 3 could describe at 9.3%.  
 193 Concurrent validity of the SUDST for Substance Use Disorder with other

194 measures including clinical diagnosis by physicians and the M.I.N.I., and the V.2  
195 were high by using contingency coefficient ( $p < 0.001$ ) (Table 4).

196

197 **Table 3.** Factor loading of the 11 items of the Substance Use Disorder Screening  
198 Test (SUDST).

| Factors                                                                   | Item | Factor loading                                   |      |
|---------------------------------------------------------------------------|------|--------------------------------------------------|------|
| <b>Factor 1</b><br>Preoccupation /<br>loss of control of<br>substance use | 1    | Used more than intention                         | 0.72 |
|                                                                           | 3    | Spent a lot of time for substance                | 0.67 |
|                                                                           | 2    | Wanted to stop or cut down but unsuccessful      | 0.55 |
|                                                                           | 4    | Craving for substance                            | 0.49 |
| <b>Factor 2</b><br>Risky /<br>harmful use                                 | 9    | Used despite the substance caused problems       | 0.73 |
|                                                                           | 8    | Used in risky situations                         | 0.69 |
|                                                                           | 10   | Tolerance                                        | 0.54 |
| <b>Factor 3</b><br>Impact of use                                          | 11   | Withdrawal symptoms                              | 0.72 |
|                                                                           | 6    | Used despite having problems with others         | 0.69 |
|                                                                           | 7    | Decreased healthy recreational activities        | 0.66 |
|                                                                           | 5    | Used until impairment in work, school, or family | 0.41 |

199

200 **Table 4.** Concurrent validity of the Substance Use Disorder Screening Test  
201 (SUDST) with the M.I.N.I., V.2, and clinical diagnosis.

| Measures                                                 | Coefficient | P-values |
|----------------------------------------------------------|-------------|----------|
| Mini international neuropsychiatric Inventory (M.I.N.I.) | .51         | <.001    |
| V.2                                                      | .57         | <.001    |
| Clinical/physician diagnosis based on DSM-5              | .54         | <.001    |

202

203

204 Table 5 shows cut off points of the SUDST to determine level substance use  
205 disorder and categorize them into three groups based on clinical judgment  
206 including low, moderate, and high risk of substance use disorder according to the  
207 physician's judgement. The score at 7 or higher had high sensitivity (77.9%) and  
208 specificity (72.7%) to determine the high risk group. The scores at 5 or 6 can  
209 define the moderate risk group (sensitivity = 88.7%; specificity = 61.9%) and the

210 scores at 3 or 4 can define the low risk group (sensitivity = 96.5%, and specificity  
211 = 66.7%). The Area Under the Curve (AUC) is in good ranges (0.83 - 0.87).

212

213 **Table 5.** Cut – off point for the Substance Use Disorder Screening Test (SUDST)  
214 comparing to the clinical judgment based on DSM-5 criteria for substance use  
215 disorders.

| Level of substance use disorder | Cut-off point | Sensitivity | Specificity | Area under curve (95% CI) |
|---------------------------------|---------------|-------------|-------------|---------------------------|
| Severe                          | ≥7            | 77.9        | 72.7%       | 0.83<br>(0.76-0.90)       |
| Moderate                        | 5-6           | 88.7%       | 61.9%       | 0.87<br>(0.81-0.93)       |
| Mild                            | 3-4           | 96.5%       | 66.7%       | 0.85<br>(0.69-1.0)        |

216

## 217 Discussion

218 The SUDST is a screening test based on DSM-5 symptom criteria for substance  
219 use disorders comprising of 11 questions regarding to the past 12 months  
220 experience of substance use with yes or no answers. The score ranging from 0 to  
221 11. It is suitable for addiction researchers/specialists to evaluate people who use  
222 substance regarding to DSM-5 diagnosis of substance use disorder by using  
223 DSM-5 diagnostic criteria or to evaluate risk of substance use especially  
224 methamphetamine by using the new cut off point for clinical purposes such as  
225 allocation of persons to specific settings (i.e. outpatient, inpatient, long-termed  
226 rehabilitation) (8).

227

228 The reliability by internal consistency of the Thai SUDST instrument is in good  
229 level with Cronbach's alpha coefficient = 0.79. Construct validity by Principal  
230 component analysis found 3 factors covered 51.8% of the variance including

231 32.3%, 10.1% and 9.3%, for Factor 1 (preoccupation / loss of control), Factor 2  
232 (risky and harmful use), and Factor 3 (impact of use), respectively. Concurrent  
233 validity of the instrument is good when compared with three measures including  
234 M.I.N.I., V.2, and clinical diagnosis/judgment ( $P < 0.001$ ). In addition to using the  
235 DSM-5 diagnostic criteria for substance use disorders, new scores of the  
236 instrument could make cut off points able to divide subjects into three categories  
237 comparable to the clinical judgment including high risk (score = 7 or more with  
238 sensitivity = 77.9% and specificity = 72.7%), moderate risk (score = 5 - 6 with  
239 sensitivity = 88.7% and specificity = 61.9%), and low risk (score = 3 - 4 with  
240 sensitivity = 96.5% and specificity = 66.7%) with the AUC in good levels (0.83 -  
241 0.87).

242

243 In the study, all of the participants used methamphetamine in the past 12 months  
244 and 67% of them used it with other illegal substances. This proportion is  
245 consistent with the annual information that more than 50% of the patients with  
246 methamphetamine use disorders at the treatment centre used other illegal  
247 substances in the past 12 months (4). Using more than one substance increase  
248 harm and negative outcomes which might interfere with level of risk and result to  
249 different result of the screening (11). We did not exclude participants who used  
250 more than one substances in this study. However, including persons who used  
251 other substances than methamphetamine reflects the real world situation that  
252 would make the SUDST to be used generally.

253

254 Factor analysis of the SUDST revealed three components including  
255 preoccupation or loss of control, risky/harmful use, and impact of use. The result  
256 is consistent with other instruments related to measuring the severity or risk of  
257 substance. For example, Khon Kaen University-Volatile Use Disorder  
258 Identification Test (KKU-VOUDIT) (12), a ten-question questionnaire, comprised  
259 of three components including intoxication or impact of use, preoccupation or loss  
260 of control, and harmful use. Nevertheless, The DSM-5 diagnostic criteria for  
261 substance use disorder suggested four components of the disorder including  
262 impaired control, social impairment, risky use, and pharmacological component  
263 (9). In general, preoccupation or loss of control over substance use is usually  
264 considered to be the core symptoms of addiction by the definition of addiction  
265 that continuing to use or seek for substances despite knowing that it causes harm  
266 to oneself. Four items were in this core component to reflect the impaired control  
267 including 1) using substance more than intended 2) unable to stop or cut down  
268 substance use 3) spending a lot of time using/interacting with the substance and  
269 4) craving for substance.

270

271 The pharmacological aspect has not appeared as a component in the study.  
272 Specifically, the two questions reflecting the pharmacological aspect of substance  
273 use disorder (e.g., tolerance and withdrawal) were each either included into the  
274 component of risky / harmful use or in component of the impact of use. Regarding  
275 the items for the component of risky/harmful use, they include 1) using substance  
276 in a risky situation (i.e., driving, operating machinery) 2) using substance despite  
277 knowing it causes physical, psychological, or other problems and 3) increasing  
278 the amount of substance to get the same effect or experiencing reduced effect

279 while using the same amount of substance. It is understandable that tolerance of  
280 a substance especially the question asking about increasing the amount of  
281 substance in order to get the same effect may be viewed as risky/harmful use by  
282 the persons who use substance.

283

284 Likewise, having withdrawal symptoms from methamphetamine, including fatigue,  
285 hypersomnia, irritable or depressed mood may be viewed as negative impacts of  
286 substance use and are included in the component of impacts of use. The other  
287 items in this component include 1) regular use of substance until having impaired  
288 function for work, study, or family 2) using substance despite it caused  
289 interpersonal relationship (i.e., domestic violence, physical or verbal fights) and 3)  
290 reduced social or recreational activities due to substance use.

291

292 Several limitations of the study deserve to be mentioned. The study took place in  
293 addiction treatment settings so the most of the participants mostly had problems  
294 from substance use and might not reflect those with milder level of substance  
295 use. Further study should test the instrument in primary health care where more  
296 persons with mild level or use without any level of substance use disorder would  
297 be included. In addition, larger sample size would give more power to test the  
298 instrument. People who use other substances including illegal substances (i.e.,  
299 cannabis, kratom, opioids) or legal substances (i.e., alcohol, tobacco) should be  
300 recruited to test the reliability and validity of the instrument.

301

302 By using the SUDST, as well as the risk assessment by the V.2 which has  
303 already been formally used, the severity of the disorder is divided into three levels  
304 of risk including mild, moderate, and severe. By doing so, substance use disorder  
305 is viewed as a spectrum and not a binary of disease (e.g., abuse or dependence).  
306 This work is in agreement with the ASSIST (7) and the DSM-5 diagnostic criteria  
307 (9) (which is the basis of the SUDST). The SUDST cut-off point for the mild level  
308 of the risk for substance use disorder has 97% sensitivity, making the instrument  
309 a good candidate for screening persons with risky behavior of substance use to  
310 the various level of severity and referral to an appropriate setting at the beginning  
311 stages of the diseases. Therefore, the SUDST is an option to be used in health  
312 care setting to differentiate the severity of substance use.

### 313 ***Acknowledgements***

314 We would like to thank Viroj Verachai, M.D. for facilitating the process of the  
315 study. We would also like to thank all participants for their time and efforts. R.K.'s  
316 research career is supported by the Centre for Addiction Studies (supported by  
317 The Thai Health Promotion Foundation) and the R01 DA037974 and the D43  
318 TW009087/TW/FIC NIH HHS, US.

### 319 ***Conflicts of interest statement:***

320 The authors report no conflicts of interest.

### 321 **References**

- 322 1. UNODC. World Drug Report 2021. United Nations publication; 2021.  
323 Report No.: Sales No. E.21.XI.8.

- 324 2. Centre for Addiction Studies. Survey on substance uses and attitude  
325 toward substances in the Thai population aged 15-65 years. Faculty of Medicine,  
326 Chulalongkorn University, Bangkok; 2020.
- 327 3. Kanato M, Leyatikul P, Wonguppa R. Size estimation of substances users  
328 population in Thailand 2019. ONCB journal. 2020;36(2):37-48.
- 329 4. Princess Mother National Institute on Drug Abuse Treatment. Statistics on  
330 substance abuse treatment at the Princess Mother National Institute on Drug  
331 Abuse Treatment in 2015-2019. Pathumtani; 2019.
- 332 5. Rukngan W, Singhtho T, Noikorn S, Phonsamrong S, Nuannum D,  
333 Phajaroen S. Psychiatric symptoms in Amphetamine-Type stimulants (ATS) in-  
334 patients at Thanyarak Institute. Thai Journal of Addiction. 2013;1:6-14.
- 335 6. Integrated Management of Alcohol Intervention program. The Alcohol,  
336 Smoking and Substance Involvement Screening Test (ASSIST) Manual for use in  
337 primary care, Thai version. Integrated Management of Alcohol Intervention  
338 program; 2011.
- 339 7. World Health Organization. The Alcohol, Smoking and Substance  
340 Involvement Screening Test (ASSIST) : Manual for use in primary care. World  
341 Health Organization; 2010.
- 342 8. Narcotics Control Management Center Thailand Ministry of Public Health.  
343 Strategic plan for substance abuse treatment and rehabilitation budget years  
344 2021-2023. 2021.
- 345 9. American Psychiatric Association. Diagnostic and Statistical Manual of  
346 Mental Disorders, Fifth Edition (DSM-5). Arlington, VA: American Psychiatric  
347 Publishing; 2013.



- 348 10. Kongsomboon K. Textbook of edidemiological research for medical  
349 students. Bangkok2014.
- 350 11. Australian Government Department of Health. Patterns of use and harms  
351 associated with specific populations of methamphetamine users in Australia -  
352 exploratory research. <https://www1.health.gov.au/>; 2008.
- 353 12. Arunpongpaisal S, Kanato M, Chiaviriyabunya I, Daosodsai S, Kamproa S.  
354 Tools development and validity testing of Khon Kaen University-Volatile Use  
355 Disorder Indentification Test (KKU-VOUDIT) to classify severity of volatile users.  
356 J Psychiatr Assoc Thailand. 2010;55(1):63-78.
- 357
